# Supplementary material for: The Effect of Race-Ethnicity on the Comparative Effectiveness of Clozapine Among Medicaid Beneficiaries
Source: Atypon-hosted journal article supplement (doi:10.1176/appi.ps.201200041), 2012-12-17

## Florida Counties, by Area

| Area | Counties                                                                                                                                  |
|------|-------------------------------------------------------------------------------------------------------------------------------------------|
| 1    | Escambia; Okaloosa; Santa Rosa; Walton                                                                                                    |
| 2    | Bay; Calhoun; Franklin; Gadsden; Gulf; Holmes; Jackson; Jefferson; Leon; Liberty; Madison; Taylor; Wakulla; Washington                    |
| 3    | Alachua; Bradford; Citrus; Columbia; Dixie; Gilchrist; Hamilton; Hernando; Lafayette; Lake; Levy; Marion; Putnam; Sumter; Suwannee; Union |
| 4    | Baker; Clay; Duval; Flagler; Nassau; St Johns; Volusia                                                                                    |
| 5    | Pasco; Pinellas                                                                                                                           |
| 6    | Hardee; Highlands; Hillsborough; Manatee; Polk                                                                                            |
| 7    | Brevard; Orange; Osceola; Seminole                                                                                                        |
| 8    | Charlotte; Collier; Desoto; Glades; Hendry; Lee; Sarasota                                                                                 |
| 9    | Indian River; Martin; Okeechobee; Palm Beach; St Lucie                                                                                    |
| 10   | Broward                                                                                                                                   |
| 11   | Dade; Monroe                                                                                                                              |

## Cohort Building Flowchart

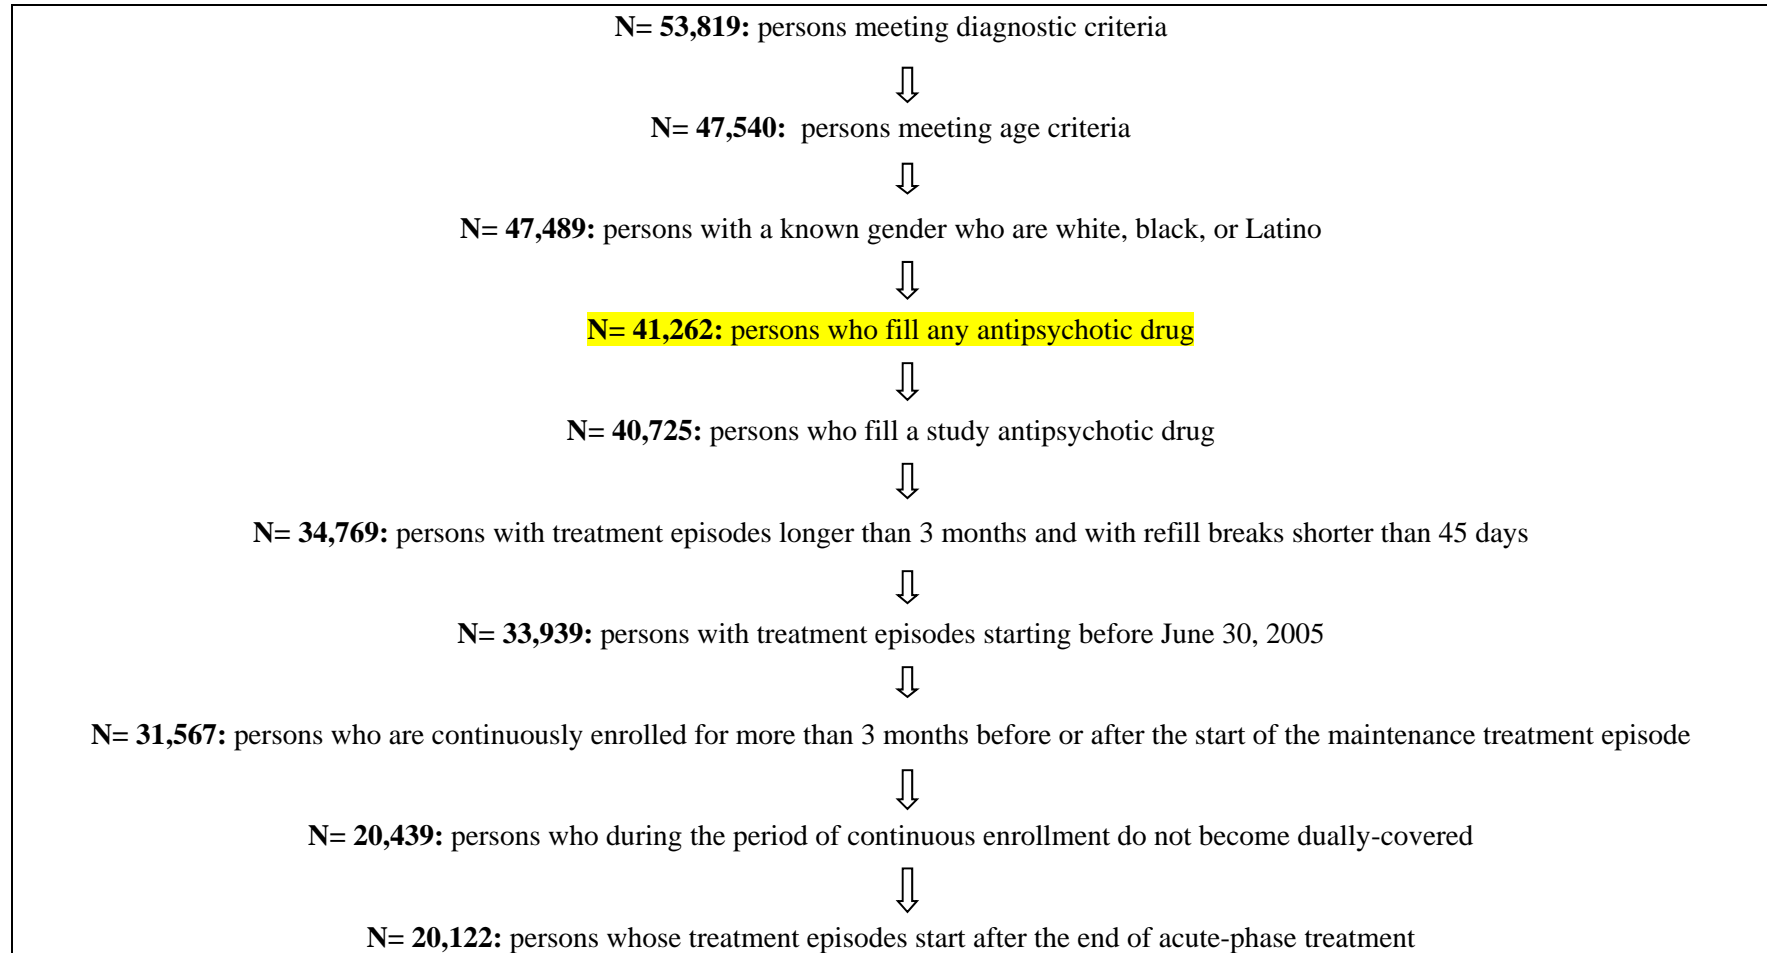

Figure 1. Survival Curve for Risk of Discontinuation, by Antipsychotic Drug Treatment and Race-Ethnicity

### Clozapine versus Other Antipsychotics (n = 749 matched sets)

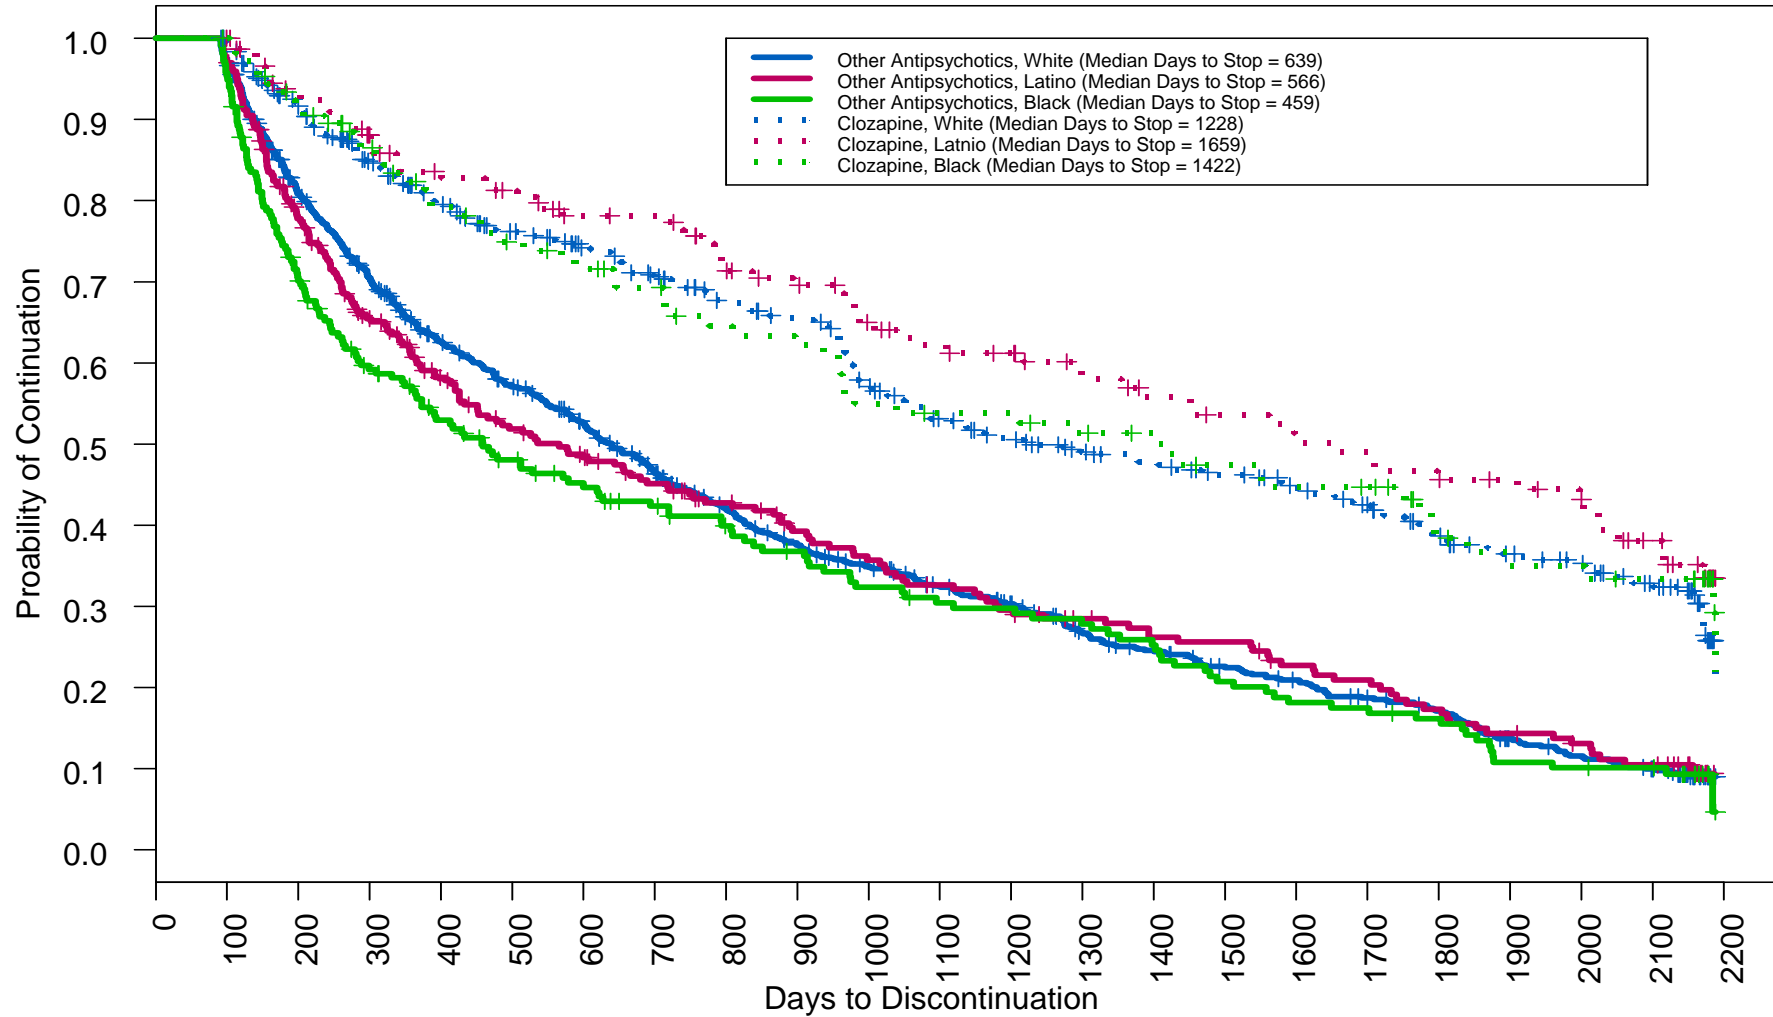

Figure 2. Survival Curve for Secondary Outcome (Risk of Discontinuation or Hospitalization), by Antipsychotic Drug Treatment and Race-Ethnicity

### Clozapine versus Other Antipsychotics (n = 749 matched sets)

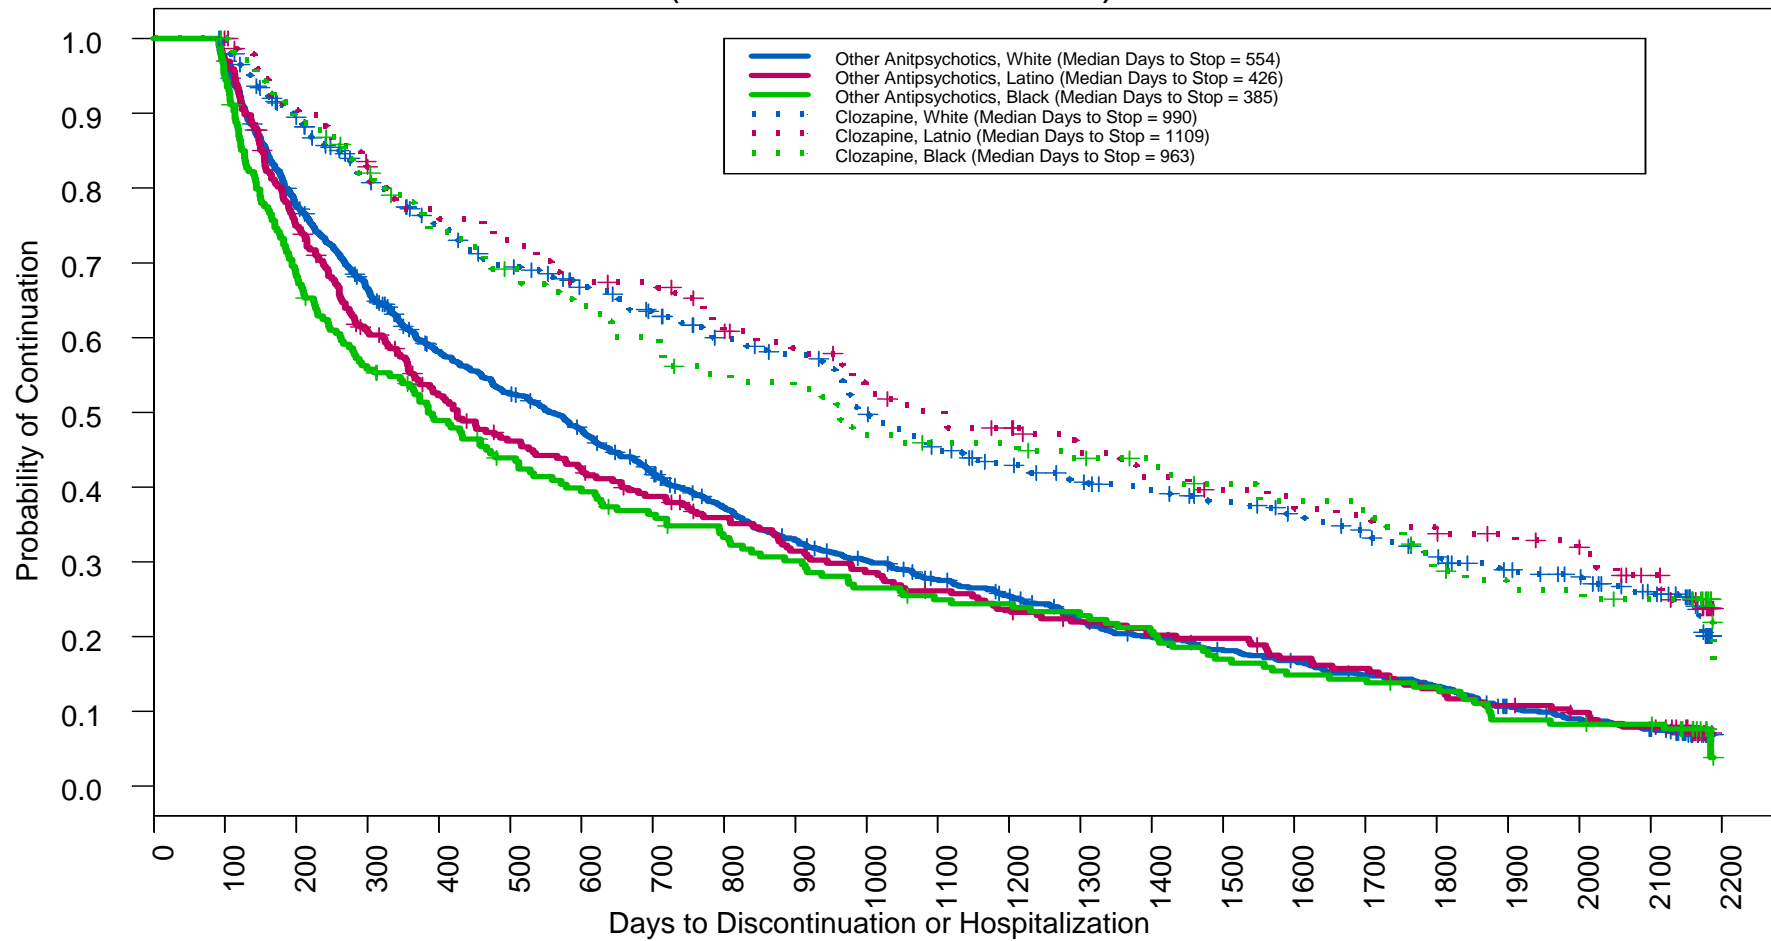

Figure 3. Survival Curve for Analyses Comparing Clozapine to Other Atypicals: Primary Outcome (Risk of Discontinuation), by Antipsychotic Drug Treatment and Race-Ethnicity

### Clozapine versus Other Atypical Antipsychotics (n = 749 matched sets)

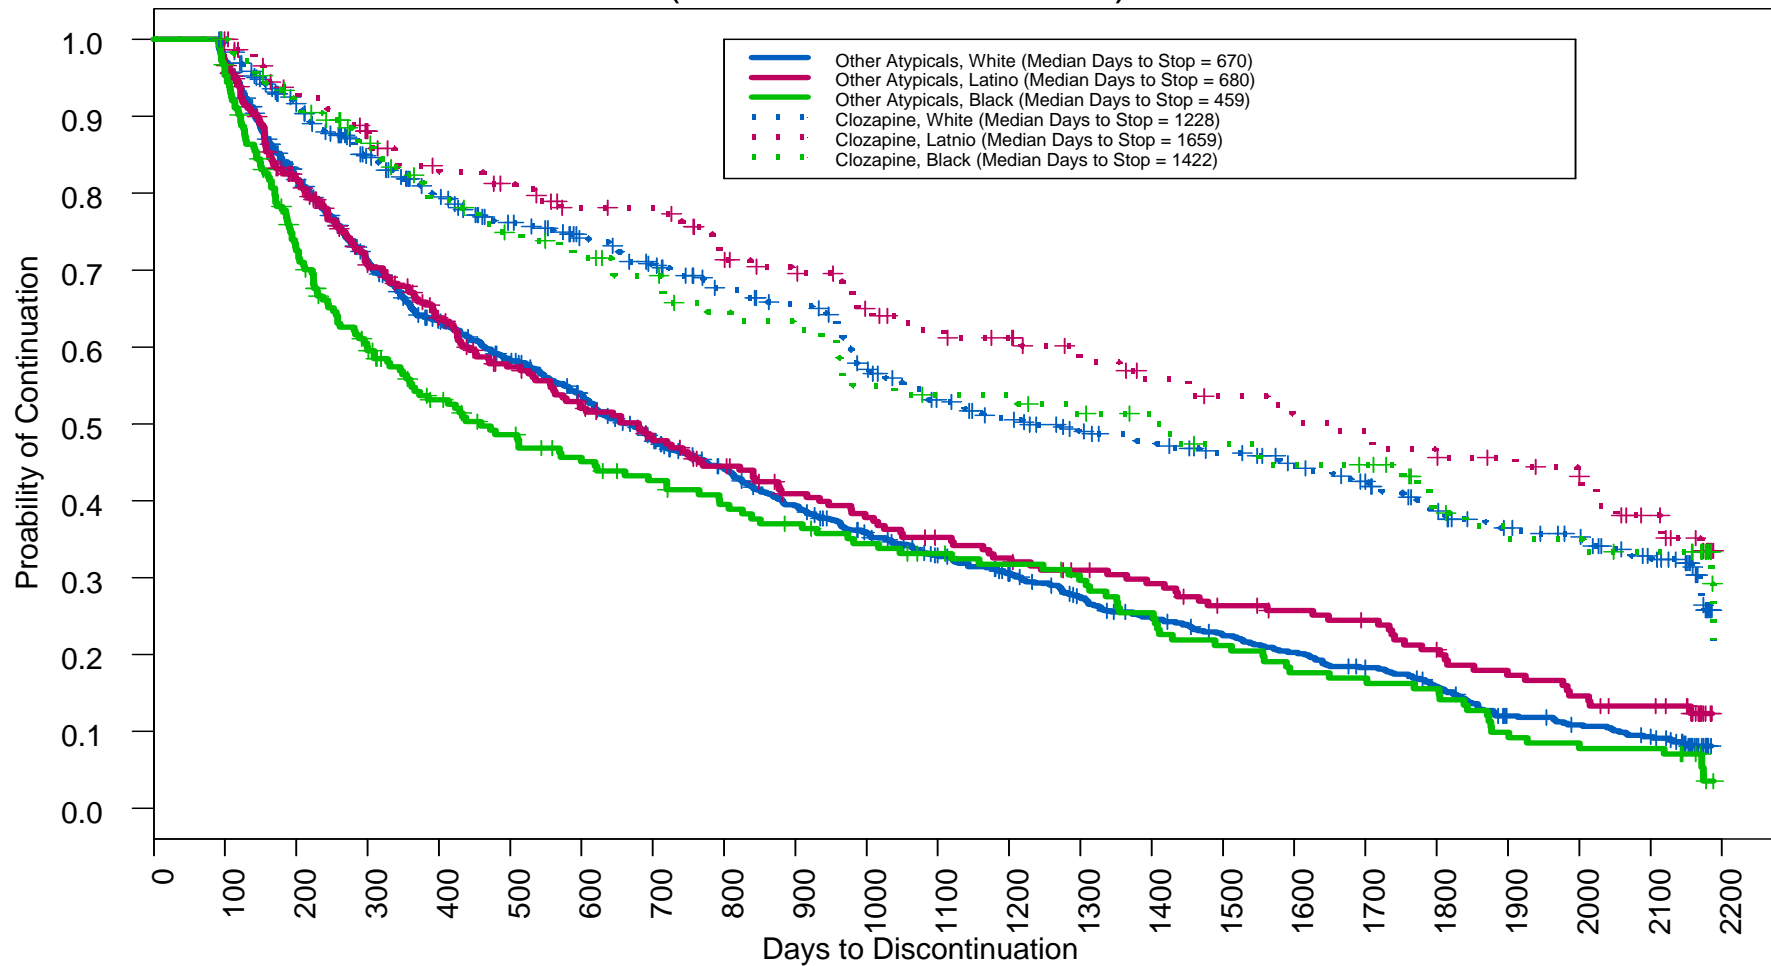

Figure 4. Survival Curve for Analyses Comparing Clozapine to Other Atypicals: Primary Outcome (Risk of Discontinuation or Hospitalization), by Antipsychotic Drug Treatment and Race-Ethnicity

### Clozapine versus Other Atypicals Antipsychotics (n = 749 matched sets)

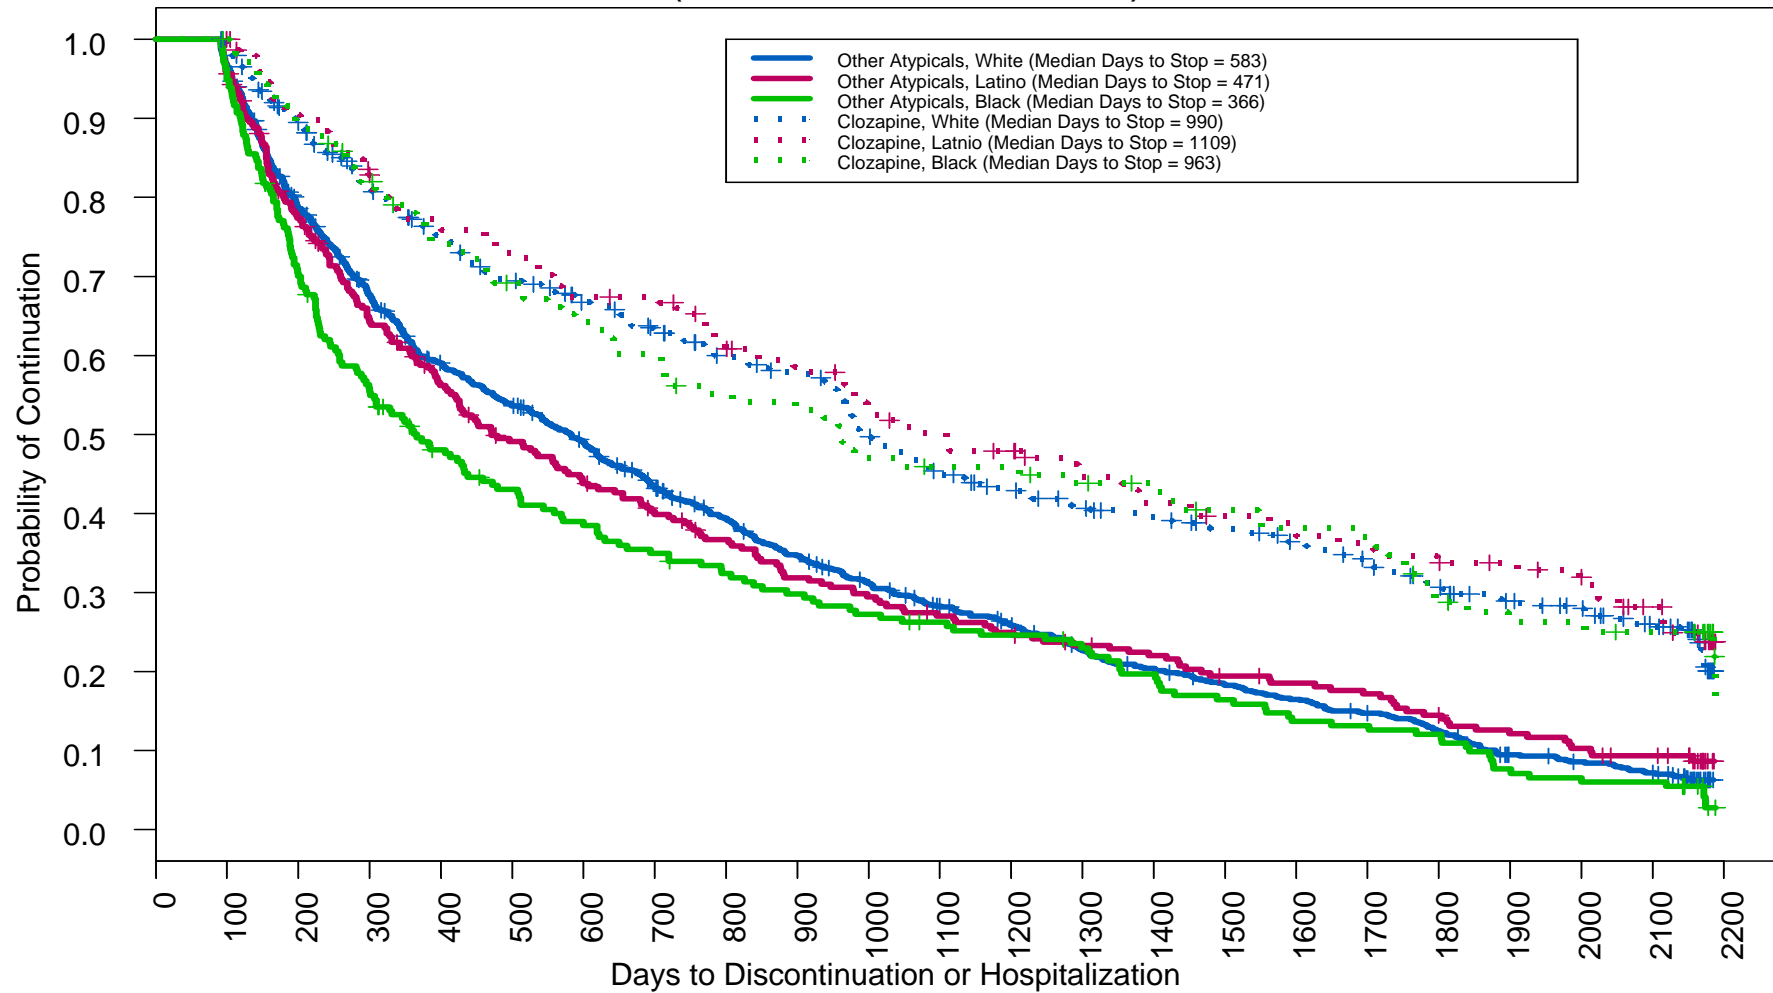

Supplement: 230_ds001.pdf [file 230_ds001.pdf]
